# Supplementary material for: Risk factors and diverse management approaches for intertrigo: Analysis of the “All of Us” research cohort
Source: Research Square preprint supplement (doi:10.21203/rs.3.rs-6866473/v1), 2025-09-23
Supplement: Supplementary file 1 [file 92fe94f6fbcfd0751487c459.docx]

**Online resources**

**Online Resource 1: International Classification of Diseases (ICD) or Systematized Nomenclature of Medicine (SNOMED) codes for comorbidities.**

| **Code(s) (ICD-10, ICD-9)** | **Description** |
| --- | --- |
| L02 | Cutaneous abscess, furuncle, carbuncle |
| B37.2, 112.3 | Candidiasis of skin and nails |
| L03, 682 | Cellulitis |
| L08.1 | Erythrasma |
| L01, 684 | Impetigo |
| L08.8, L08.9 | Unspecified local skin infection, other specified local skin infection |
| L08.0, 686.0 | Pyoderma |
| B35, 110 | Tinea |
| SNOMED: 73211009 | Diabetes mellitus |
| SNOMED: 59621000 | Hypertension |
| R15, N39.3, N39.4 | Incontinence (fecal or urinary) |
| L70, 706.1 | Acne |
| L20, 691 | Atopic dermatitis |
| L40, 696 | Psoriasis |
| L71, 695.3 | Rosacea |
| L21, 690.1 | Seborrheic dermatitis |

**Online Resource 2: Classes of topical corticosteroids**

| **Class** | | **Corticosteroid (Formulation)** |
| --- | --- | --- |
| I | Super-potent | Augmented betamethasone dipropionate 0.05% ointment |
| Clobetasol propionate 0.05% cream or ointment or foam |
| Diflorasone diacetate 0.05% ointment |
| Fluocinonide 0.1% cream |
| Halobetasol propionate 0.05% cream or ointment |
| II | Potent | Amcinonide 0.1% ointment |
| Betamethasone dipropionate 0.05% cream |
| Betamethasone dipropionate 0.05% ointment |
| Desoximetasone 0.25% cream, 0.05% gel, 0.25% ointment |
| Diflorasone diacetate 0.05% ointment |
| Fluocinonide 0.05% cream, gel, ointment, or solution |
| Halcinonide 0.1% cream, ointment, or solution |
| Mometasone furoate 0.1% ointment |
| III | Moderate | Amcinonide 0.1% cream or lotion |
| Betamethasone dipropionate 0.05% cream |
| Betamethasone dipropionate 0.05% lotion |
| Betamethasone valerate 0.1% ointment |
| Desoximetasone 0.05% cream |
| Diflorasone diacetate 0.05% cream |
| Fluocinonide c 0.05% emollient cream |
| Fluticasone propionate 0.005% ointment |
| Triamcinolone acetonide 0.1% ointment |
| IV | Fluocinolone acetonide 0.025% ointment |
| Flurandrenolide 0.05% ointment |
| Mometasone furoate 0.1% cream or lotion |
| Triamcinolone acetonide 0.1% cream or ointment |
| V | Betamethasone valerate 0.1% cream |
| Desonide 0.05% ointment |
| Fluocinolone acetonide 0.025% cream |
| Flurandrenolide 0.05% cream |
| Fluticasone propionate 0.05% cream |
| Hydrocortisone butyrate 0.1% cream, ointment, or solution |
| Hydrocortisone valerate 0.2% cream or ointment |
| Triamcinolone acetonide 0.1% lotion or 0.025% ointment |
| VI | Weak | Alclometasone dipropionate 0.05% cream or ointment |
| Betamethasone valerate 0.1% lotion |
| Desonide 0.05% cream |
| Flumethasone pivalate 0.03% cream (not available in the United States) |
| Fluocinolone acetonide 0.01% cream or solution |
| Triamcinolone acetonide 0.1% cream |
| Triamcinolone acetonide 0.025% cream or lotion |
| VII | Hydrocortisone 1% or 2.5% cream, 1% or 2.5% lotion, 1% or 2.5% ointment |
